# Supplementary material for: Modeling and Measuring Signal Relay in Noisy Directed Migration of Cell Groups
Source: PLOS journal article supplement (doi:10.1371/journal.pcbi.1003041), 2013-05-02
Supplement: S3 (10.1371/journal.pcbi.1003041.s003) [file journal.pcbi.1003041.s003]

301 Moved Permanently

# Moved Permanently

The document has moved here.

---

Apache Server at www.ploscompbiol.org Port 80
